# Supplementary material for: Simulation of Molecular Dynamics of SARS-CoV-2 S-Protein in the Presence of Multiple Arbidol Molecules: Interactions and Binding Mode Insights
Source: MDPI journal article supplement (doi:10.3390/v14010119), 2022-01-10
Supplement: s1 [file s1]

# Simulation of Molecular Dynamics of SARS-CoV-2 S-Protein in the Presence of Multiple Arbidol Molecules: Interactions and Binding Mode Insights

Sophia S. Borisevich <sup>1,\*</sup>, Edward M. Khamitov <sup>1</sup>, Maxim A. Gureev <sup>2,3</sup>, Olga I. Yarovaya <sup>4,\*</sup>,  
Nadezhda B. Rudometova <sup>5</sup>, Anastasiya V. Zybkina <sup>5</sup>, Ekaterina D. Mordvinova <sup>4</sup>, Dmitriy N.  
Shcherbakov <sup>5</sup>,  
Rinat A. Maksyutov <sup>5</sup> and Nariman F. Salakhutdinov <sup>4</sup>

<sup>1</sup> Ufa Federal Research Center, Laboratory of Chemical Physics Ufa Institute of Chemistry, RAS, Octyabrya pr., 71, 450054 Ufa, Russia; khamitovem@gmail.com

<sup>2</sup> Research Center "Digital Biodesign and Personalized Healthcare", I.M. Sechenov First Moscow State Medical University, 119991 Moscow, Russia; max\_techNIK@mail.ru

<sup>3</sup> Department of Computational Biology, Sirius University of Science and Technology, 354349 Sochi, Russia

<sup>4</sup> Department of Medicinal Chemistry, N.N. Vorozhtsov Novosibirsk Institute of Organic Chemistry SB RAS, Lavrent'ev Av., 630090 Novosibirsk, Russia; mordvinova97@mail.ru (E.D.M.); anvar@nioch.nsc.ru (N.F.S.)

<sup>5</sup> State Research Center of Virology and Biotechnology VECTOR, Rospotrebnadzor, Koltsovo, 630559 Novosibirsk, Russia; andreeva\_nb@vector.nsc.ru (N.B.R.); zybkina\_av@vector.nsc.ru (A.V.Z.); dnshcherbakov@gmail.com (D.N.S.); maksyutov\_ra@vector.nsc.ru (R.A.M.)

\* Correspondence: monrel@mail.ru (S.S.B.); ooo@nioch.nsc.ru (O.I.Y.)

## Supplementary materials

### *Molecular dynamics*

#### *Initial systems used for calculations*

Hereinafter, the Arbidol molecule is shown in the form of the van der Waals model; RBD is red; ACE-2 is blue; sodium cation and chloride anion are shown green big and dark-red small balls, respectively.

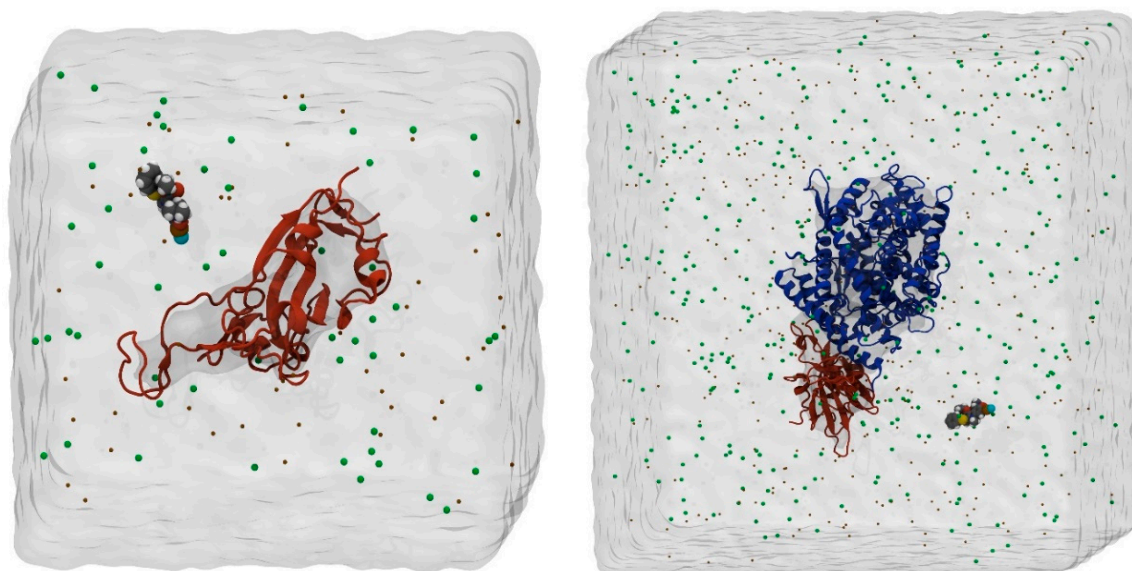

Figure-S1 RBD-1×Arb and ACE-2-RBD-1×Arb

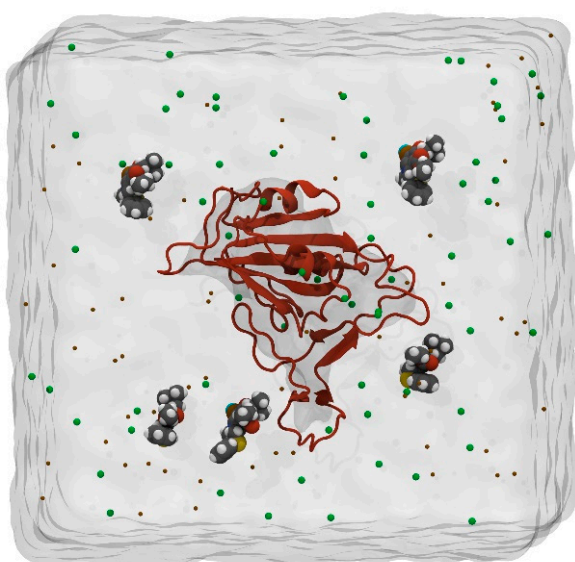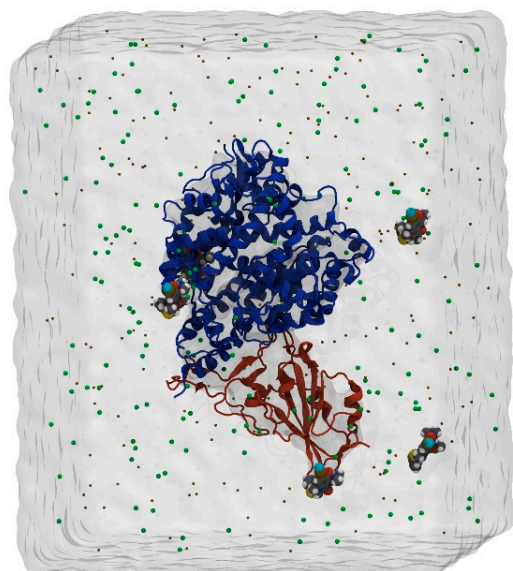

**Figure-S2** RBD-5xArb and ACE-2-RBD-5xArb

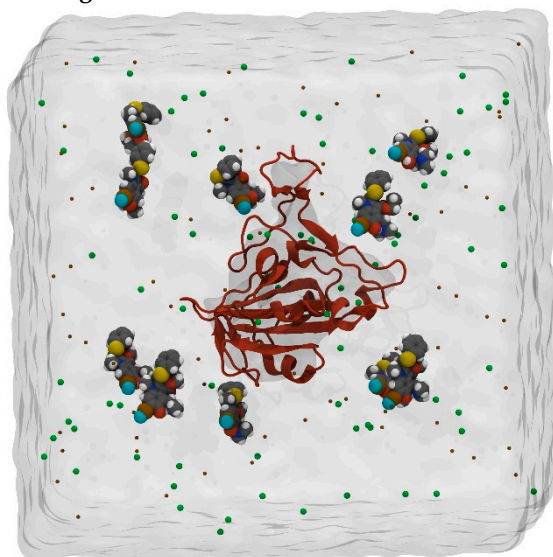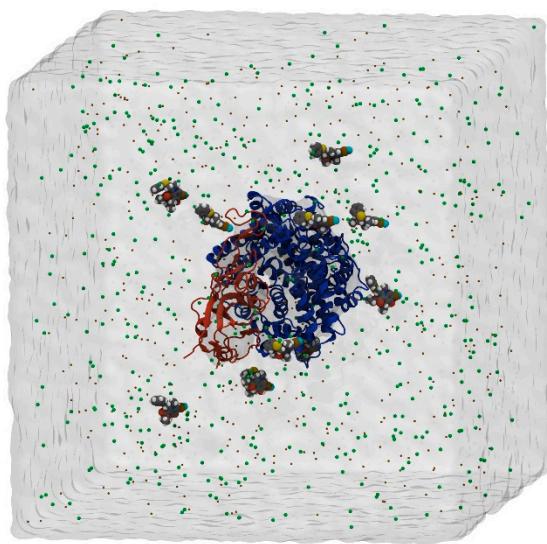

**Figure-S3** RBD-10xArb and ACE-2-RBD-10xArb

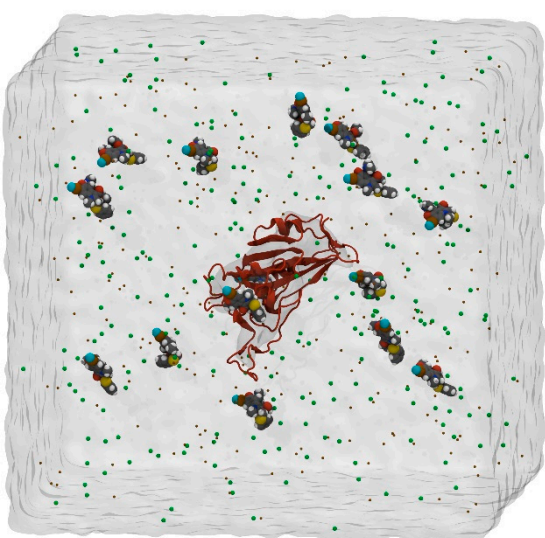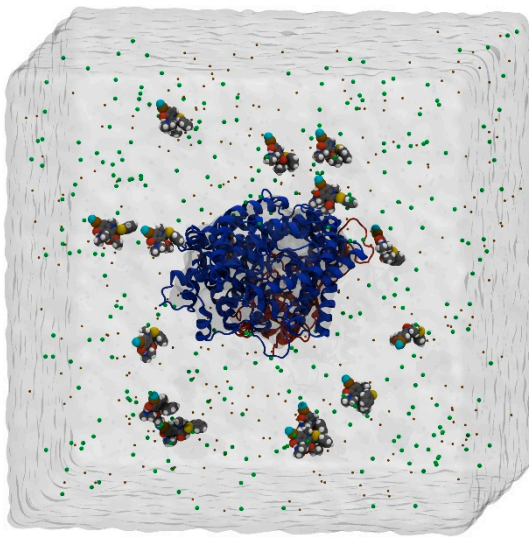

**Figure-S4** RBD-15xArb and ACE-2-RBD-15xArb



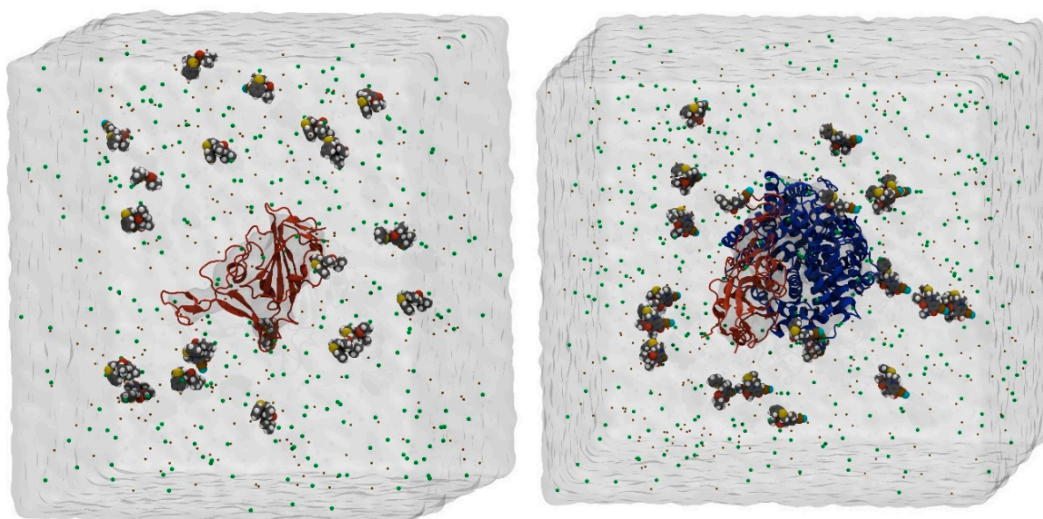

**Figure-S5** RBD-20xArb and ACE-2-RBD-20xArb

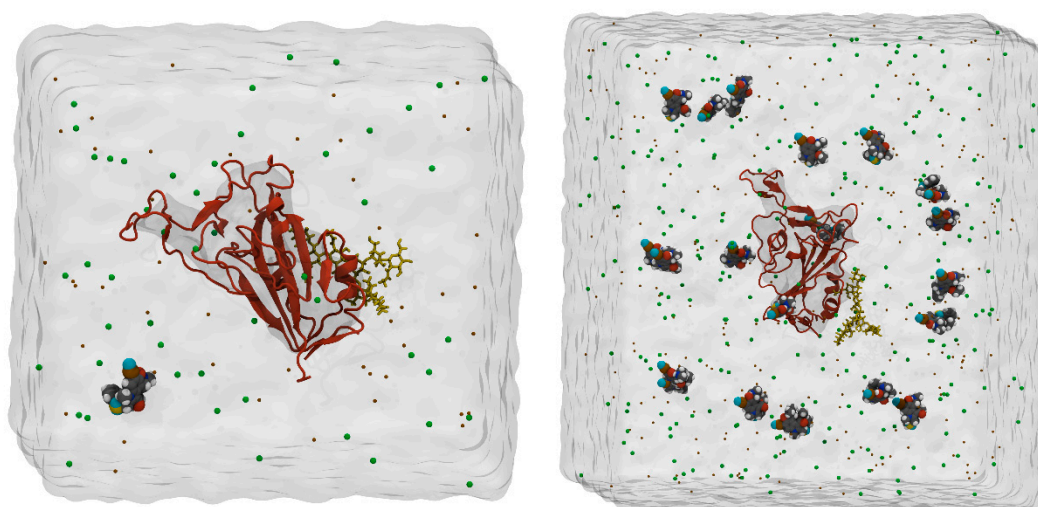

**Figure-S6** RBD-20xArb and ACE-2-RBD-20xArb

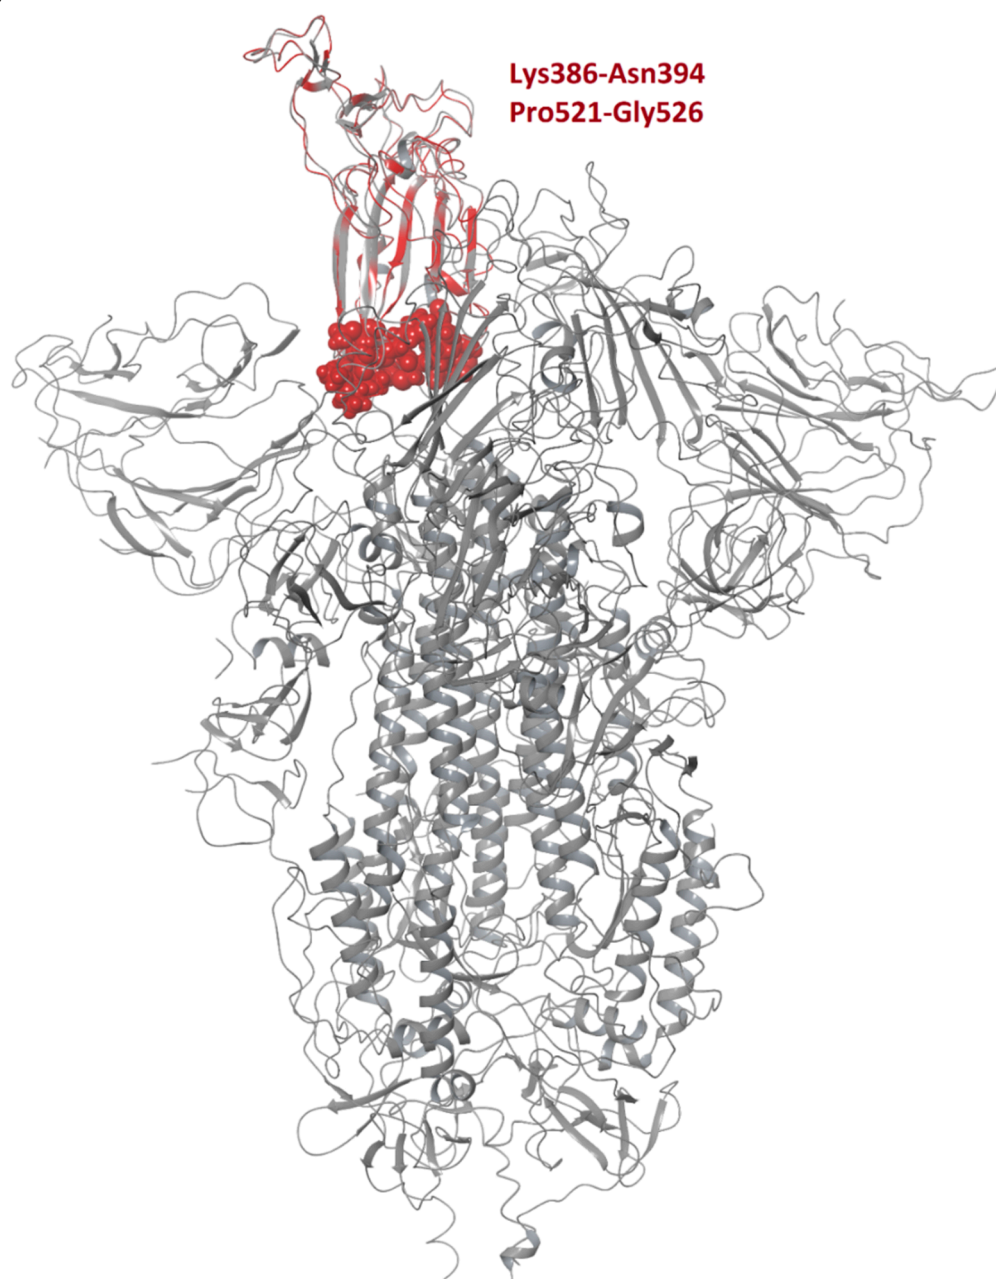

**Figure-S7** Spike-protein SARS-CoV-2 open conformation: hard-to-reach amino acids for Arbidol are shown with balls model



### Root-mean-square deviation of atomic positions

The results of molecular dynamics simulation for 300 ns at 310K are presented. In the case of ligands for systems containing 1 and 5 Arbidol molecules (RBD- $n \times$ Arb and ACE-2-RBD- $n \times$ Arb,  $n = 1, 5$ ), perturbations in RMSD values are observed (Figures S 8-9), which fade with increasing numbers of Arbidol molecules (RBD- $n \times$ Arb and ACE-2-RBD- $n \times$ Arb,  $n = 10-20$ ) (Figures S 10-12). At the same time, increasing the simulation time at an elevated temperature does not practically change the situation. The perturbations of the RMSD values of the ligand position in the RBD-1 $\times$ Arb and ACE-2-RBD-1 $\times$ Arb systems are significant (Figure S 13), while in RBD-20 $\times$ Arb and ACE-2-RBD-20 $\times$ Arb they are not significant (Figure S 14).

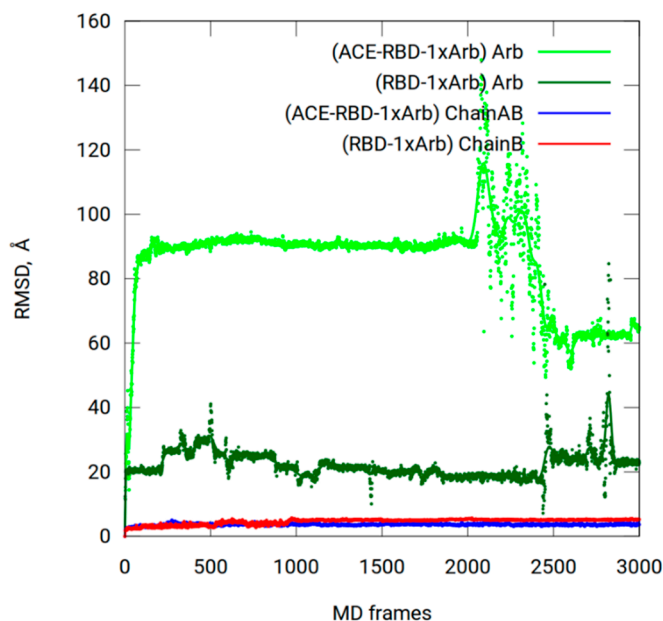

**Figure-S8** RMSD of ACE-2-RBD – 1 $\times$ Arb molecular dynamic simulation

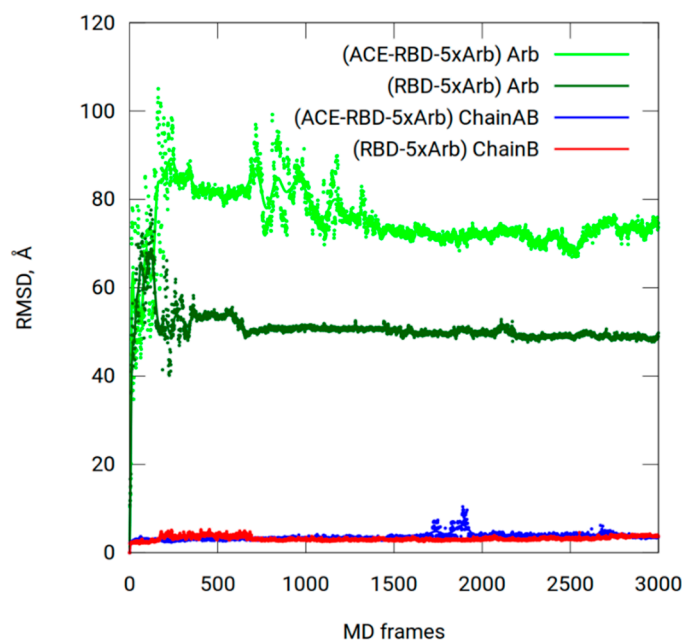

**Figure-S9** RMSD of ACE-2-RBD – 5 $\times$ Arb molecular dynamic simulation

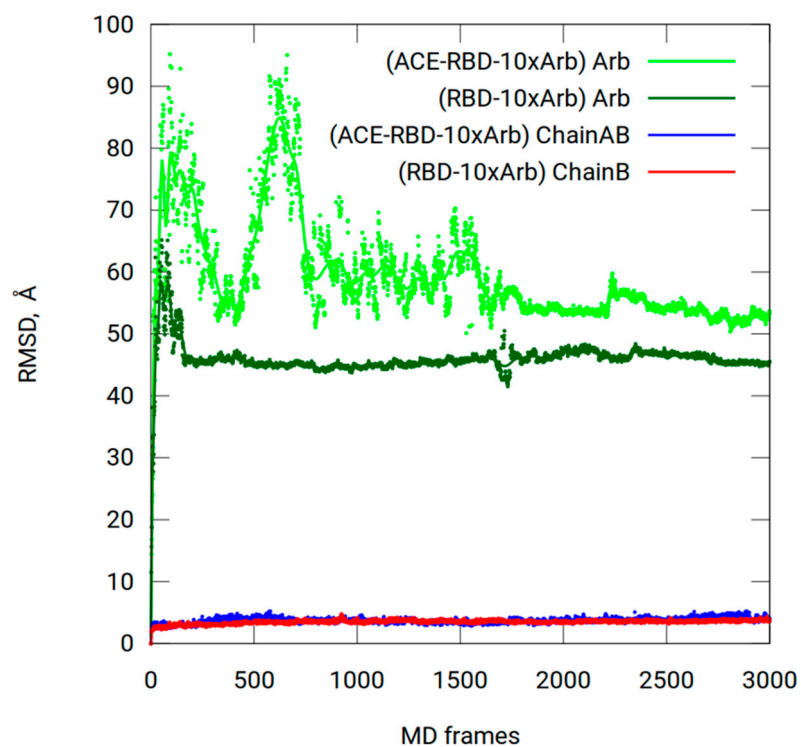

**Figure-S10** RMSD of ACE-2-RBD – 10xArb molecular dynamic simulation

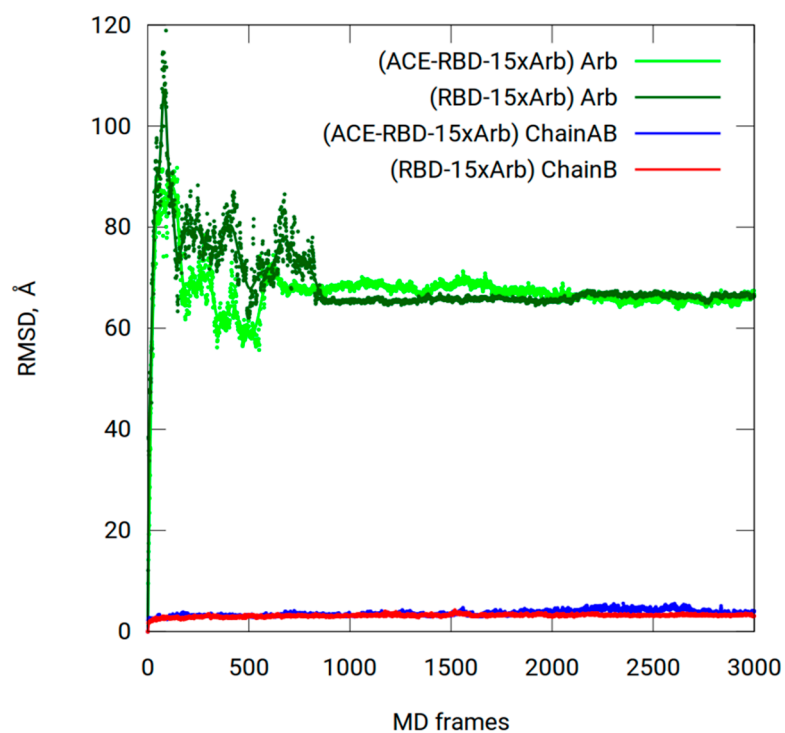

**Figure-S11** RMSD of ACE-2-RBD – 15xArb molecular dynamic simulation

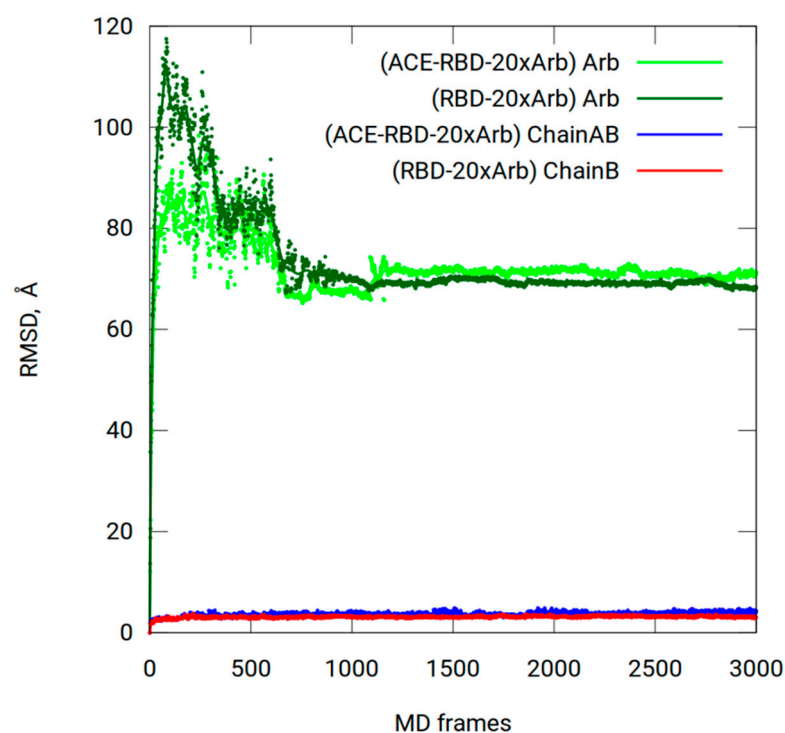

**Figure-S12** RMSD of ACE-2-RBD – 20xArb molecular dynamic simulation  
The results of molecular dynamics simulation for 100 ns at 400K are presented.

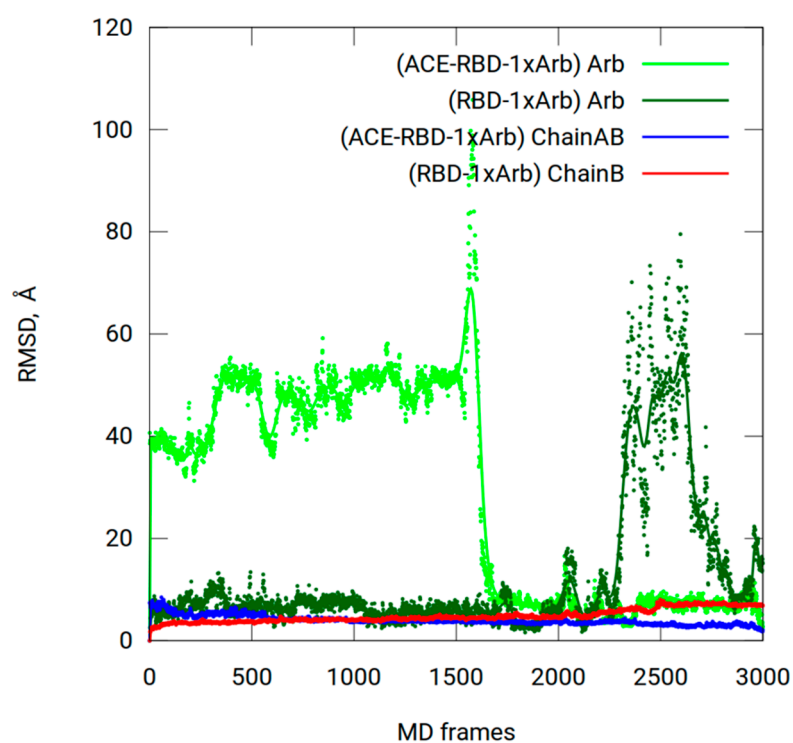

**Figure-S13** RMSD of ACE-2-RBD – 1xArb molecular dynamic simulation



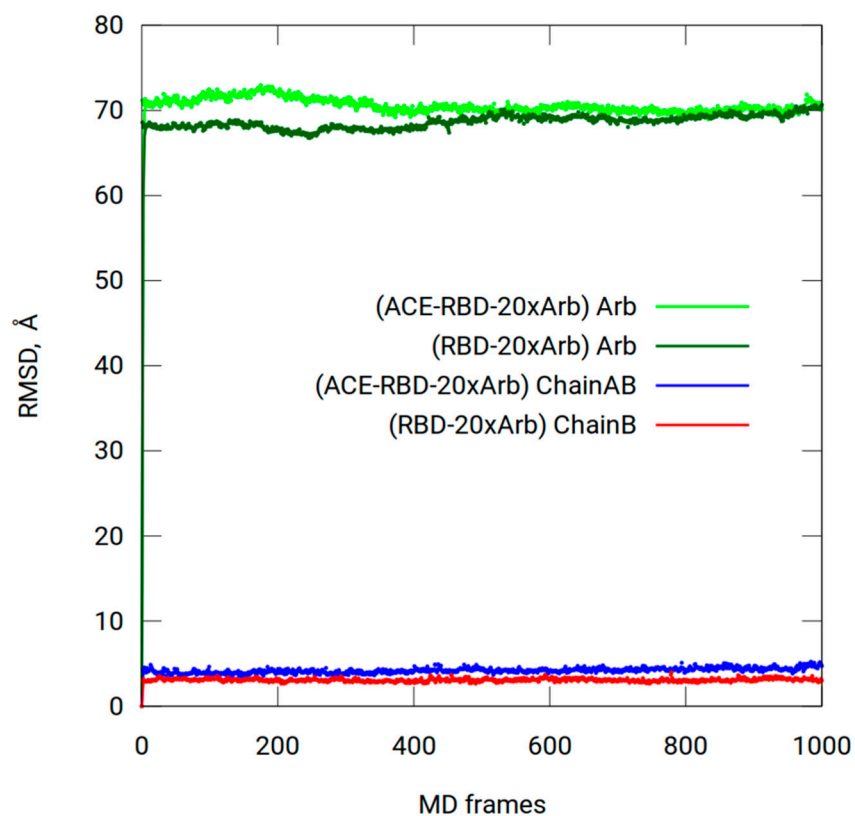

**Figure-S14** RMSD of ACE-2-RBD – 20×Arb molecular dynamic simulation

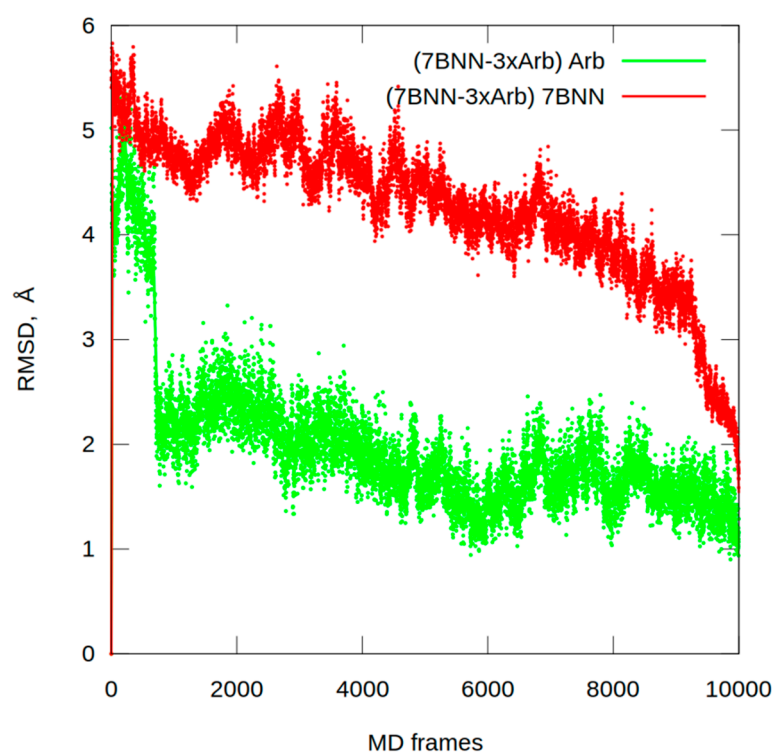

**Figure-S15** RMSD of S-protein 3×Arb molecular dynamic simulation

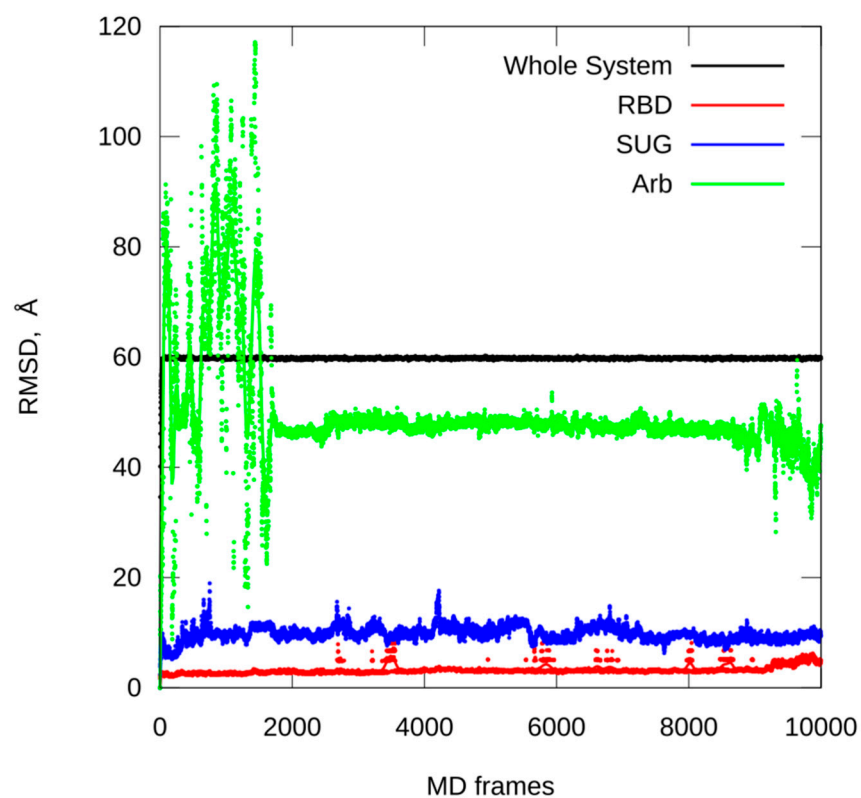

**Figure-S16** RMSD of RBD-SUR-1xArb molecular dynamic simulation

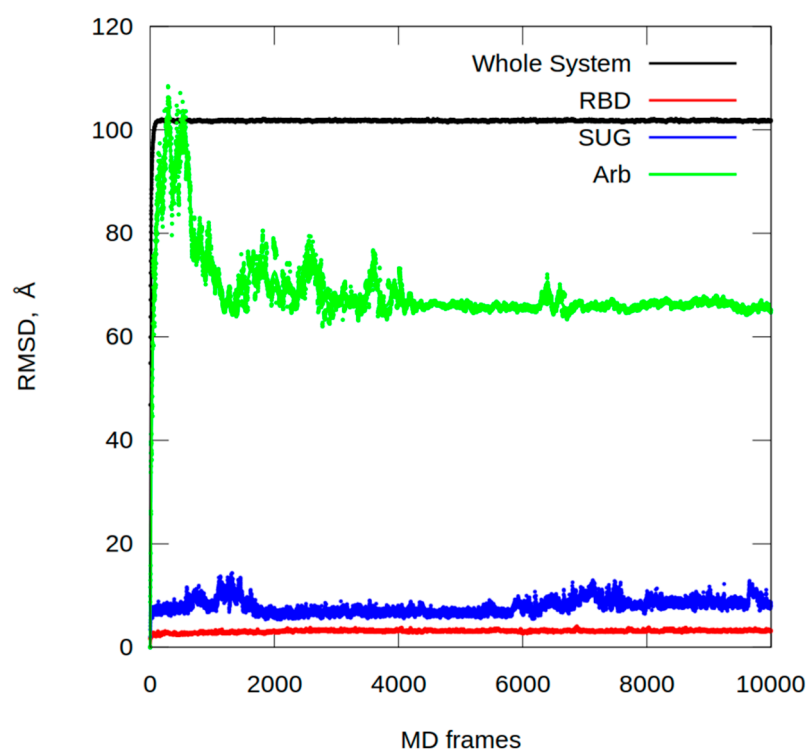

**Figure-S17** RMSD of RBD-SUR-20xArb molecular dynamic simulation

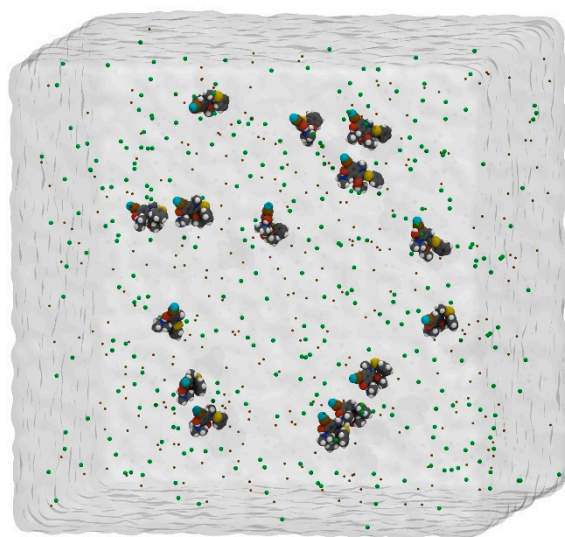

$\tau = 0$  ns

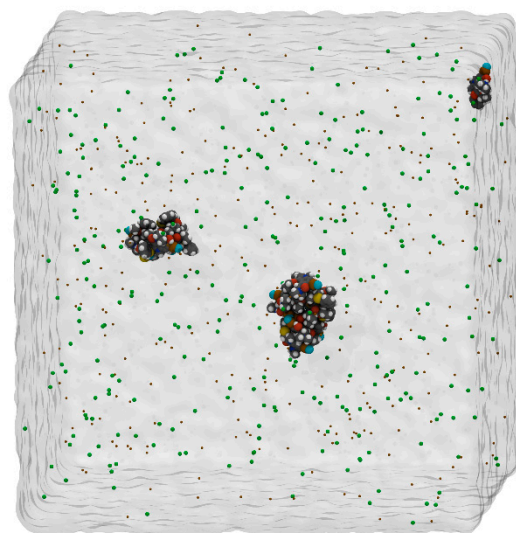

$\tau = 300$  ns

Figure-S18

*Population analysis*

**RBD-1xArb (T = 310 K)**

Asn343 – 25.2%  
Ser373 – 24.5%

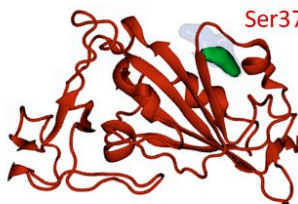

**ACE-2-RBD-1xArb (T = 310 K)**

Asn546 – 35.1%  
Pro263 – 29.4%

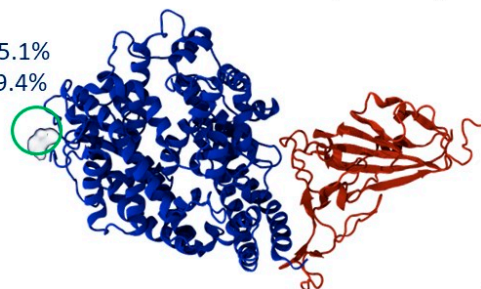

**RBD-1xArb (T = 400 K)**

Thr470 – 25.8%  
Pro491 – 11.7%

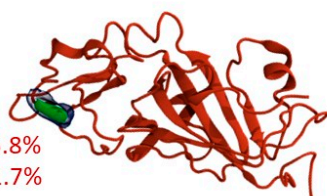

**ACE-2-RBD-1xArb (T = 400 K)**

Asn416 – 26.0%  
Tyr380 – 7.6%  
Arg408 – 5.6%

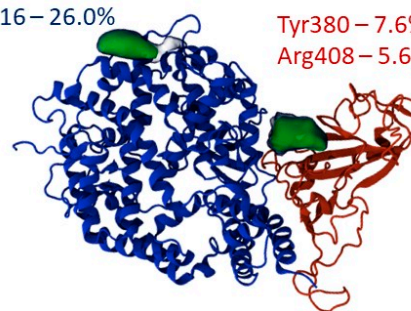

Figure-S19



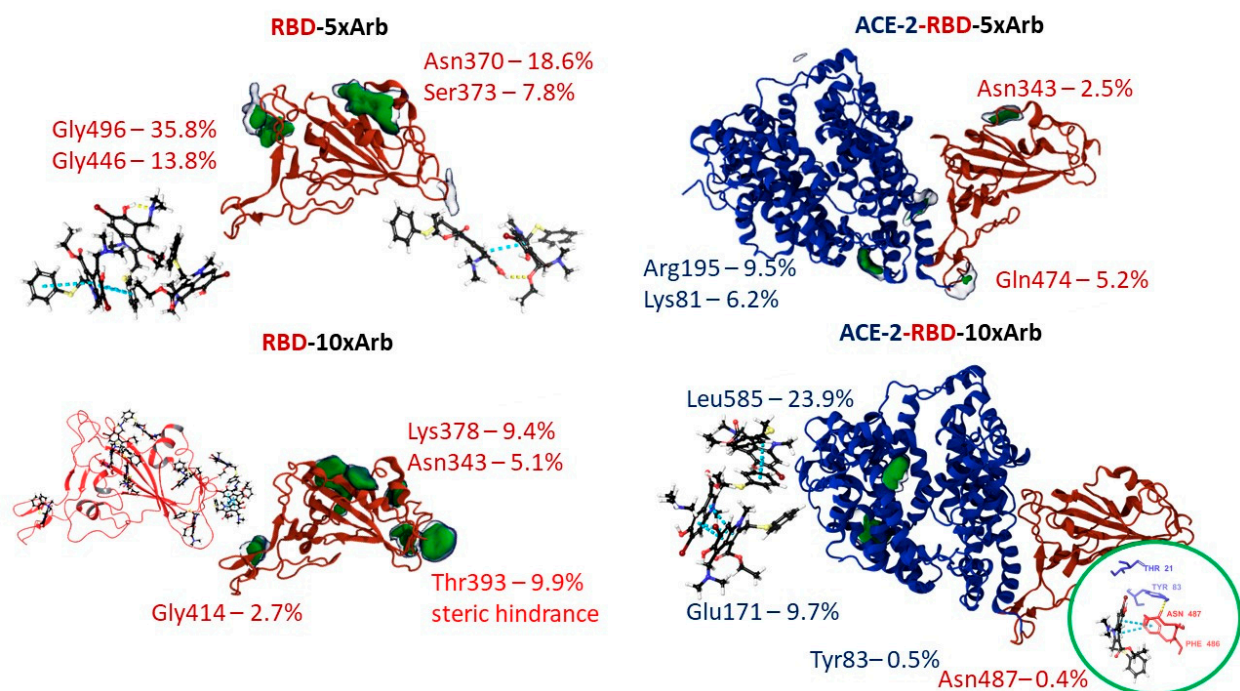

Figure-S 20

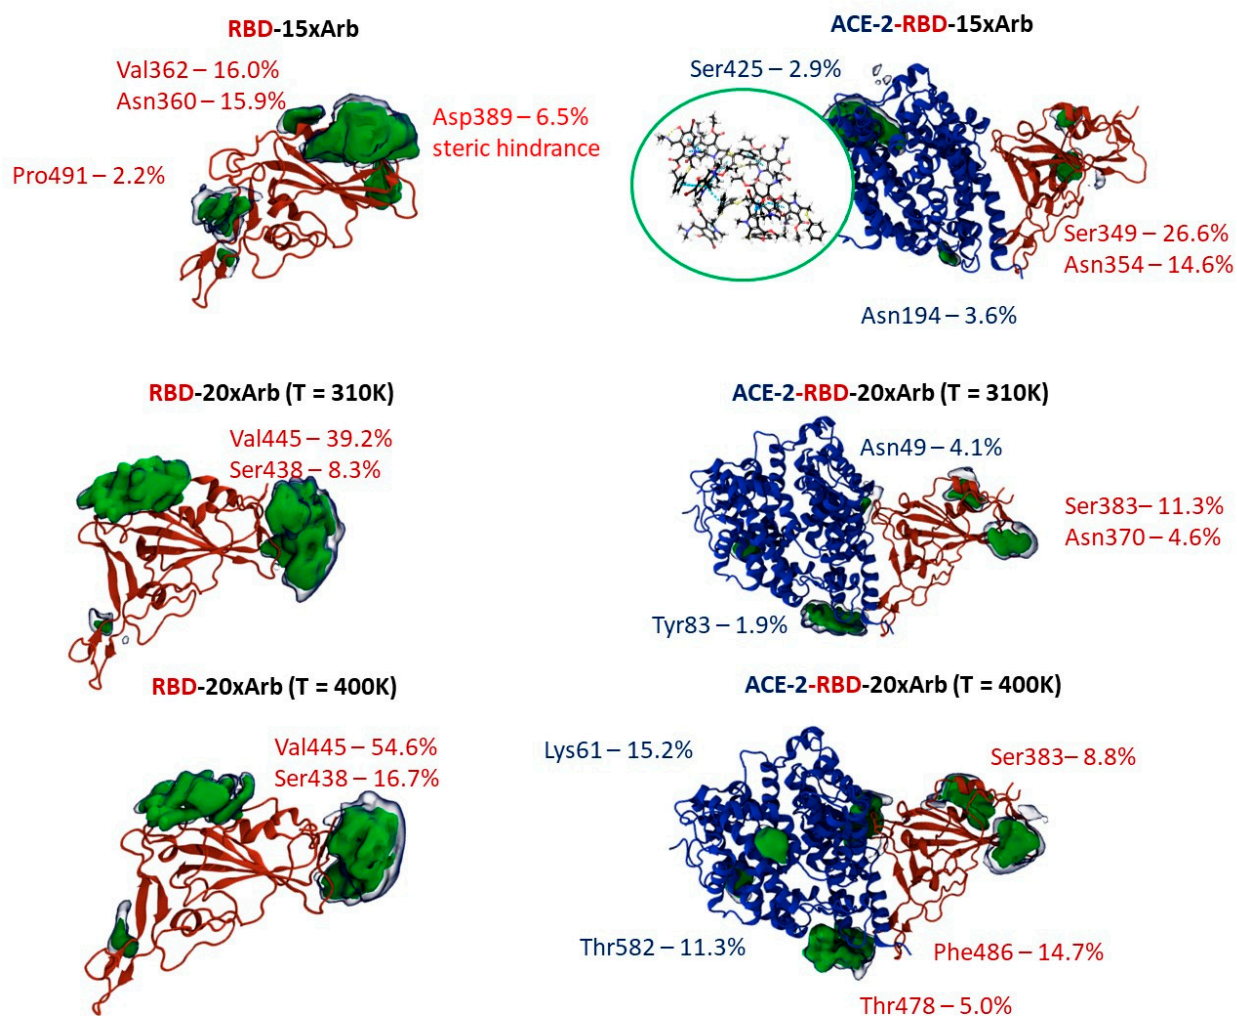

Figure-S21

**Table S1** Molecular dynamics statistics for systems RBD-n×Arb, n = 1..20 and RBD-SUG-n×Arb, (n = 1, 20)

| System                 | Amino acids | Donor-acceptor interaction | Descript of Arb | Occupancy, % | Probability of intramolecular interaction, % | Type of intramolecular interaction |
|------------------------|-------------|----------------------------|-----------------|--------------|----------------------------------------------|------------------------------------|
| RBD-1×Arb (310 K)      | Asn343      | Donor                      | O – acceptor    | 0.8          | 25.5                                         | H-bond                             |
|                        | Ser371      | Donor                      | O – acceptor    | 0.8          | 24.5                                         | H-bond                             |
|                        | Asn370      | Donor                      | O – acceptor    | 0.4          | 12.6                                         | H-bond                             |
| RBD-1×Arb (400 K)      | Thr470      | Donor                      | O – acceptor    | 0.8          | 27.6                                         | H-bond                             |
|                        | Pro491      | Donor                      | Ring            | 0.3          | 10.3                                         | $\pi$ -cation                      |
|                        | Arg545      | Donor                      | O – acceptor    | 0.3          | 10.3                                         | H-bond                             |
| RBD-SUG-1×Arb (310 K)  | Pro491      | Donor                      | Acceptor        | 0.4          | 19.8                                         | hydrophobic                        |
|                        | Tyr489      | Donor                      | Acceptor        | 0.4          | 14.0                                         | hydrophobic                        |
|                        | Tyr473      | Donor                      | Acceptor        | 0.2          | 9.0                                          | hydrophobic                        |
| RBD-5×Arb (310 K)      | Gly496      | Donor                      | O – acceptor    | 25.4         | 35.6                                         | H-bond                             |
|                        | Asn370      | Donor                      | O – acceptor    | 13.2         | 18.6                                         | H-bond                             |
|                        | Gly446      | Donor                      | O – acceptor    | 9.8          | 13.4                                         | H-bond                             |
| RBD-10×Arb (310 K)     | Thr393      | Donor                      | Ring            | 3.7          | 9.9                                          | $\pi$ -cation                      |
|                        | Lys378      | Donor                      | N - acceptor    | 3.5          | 9.4                                          | H-bond                             |
|                        | Asn343      | Acceptor                   | O - donor       | 1.8          | 5.1                                          | H-bond                             |
| RBD-15×Arb (310 K)     | Val362      | Donor                      | Ring            | 6.3          | 16.0                                         | $\pi$ -cation                      |
|                        | Asn360      | Donor                      | O - acceptor    | 6.3          | 15.9                                         | H-bond                             |
|                        | Asp389      | Donor                      | O - acceptor    | 2.6          | 6.5                                          | H-bond                             |
| RBD-20×Arb (310 K)     | Val445      | Donor                      | O - acceptor    | 31.3         | 54.6                                         | H-bond                             |
|                        | Ser438      | Donor                      | Ring            | 9.6          | 16.7                                         | $\pi$ -cation                      |
|                        | Asn388      | Acceptor                   | O - donor       | 2.6          | 4.5                                          | H-bond                             |
| RBD-SUG-20×Arb (310 K) | Gly381      | Donor                      | Acceptor        | 12.5         | 21.6                                         | H-bond                             |
|                        | Gly339      | Donor                      | Acceptor        | 7.4          | 12.5                                         | hydrophobic                        |
|                        | Asn440      | Donor                      | Acceptor        | 6.7          | 8.3                                          | hydrophobic                        |
| RBD-20×Arb (400 K)     | Val445      | Donor                      | O - acceptor    | 29.3         | 39.2                                         | H-bond                             |
|                        | Ser438      | Donor                      | Ring            | 6.2          | 8.3                                          | $\pi$ -cation                      |
|                        | Gln93       | Donor                      | O - acceptor    | 3.9          | 5.2                                          | H-bond                             |

**Table S2** Molecular dynamics statistics for systems ACE-2-RBD-n×Arb, n = 1...20.

| System                   | Amino acids    | Donor-acceptor interaction | Descript of Arb | Occupancy, % | Probability of intramolecular interaction, % | Type of intramolecular interaction |
|--------------------------|----------------|----------------------------|-----------------|--------------|----------------------------------------------|------------------------------------|
| ACE-2-RBD-1×Arb (310 K)  | Asn456 (ACE-2) | Donor                      | O – acceptor    | 1.8          | 35.1                                         | H-bond                             |
|                          | Pro263 (ACE-2) | Donor                      | Ring            | 1.4          | 29.4                                         | $\pi$ -cation                      |
|                          | Ala614 (ACE-2) | Donor                      | O – acceptor    | 0.6          | 12.0                                         | H-bond                             |
| ACE-2-RBD-1×Arb (400 K)  | Asn456 (ACE-2) | Donor                      | O – acceptor    | 1.7          | 26.0                                         | H-bond                             |
|                          | Tyr380 (RBD)   | Donor                      | O – acceptor    | 0.4          | 7.6                                          | H-bond                             |
|                          | Pro590 (ACE-2) | Donor                      | Ring            | 0.3          | 5.6                                          | $\pi$ -cation                      |
| ACE-2-RBD-5×Arb (310 K)  | Leu585 (ACE-2) | Acceptor                   | O - donor       | 5.9          | 23.9                                         | H-bond                             |
|                          | Glu171 (ACE-2) | Acceptor                   | O - donor       | 2.4          | 9.7                                          | H-bond                             |
|                          | Arg115 (Ace-2) | Donor                      | N - acceptor    | 1.4          | 5.5                                          | H-bond                             |
| ACE-2-RBD-10×Arb (310 K) | Asn195 (ACE-2) | Donor                      | O – acceptor    | 6.0          | 9.5                                          | H-bond                             |
|                          | Lys81 (ACE-2)  | Donor                      | N - acceptor    | 3.9          | 6.2                                          | H-bond                             |
|                          | Gln474 (RBD)   | Donor                      | N - acceptor    | 3.3          | 5.3                                          | H-bond                             |
| ACE-2-RBD-15×Arb (310 K) | Ser349 (RBD)   | Donor                      | O – acceptor    | 18.5         | 26.6                                         | H-bond                             |
|                          | Asn354 (RBD)   | Donor                      | O – acceptor    | 10.2         | 14.6                                         | H-bond                             |
|                          | Ser371 (RBD)   | Donor                      | O – acceptor    | 2.9          | 4.3                                          | H-bond                             |
| ACE-2-RBD-20×Arb (310 K) | Ser383 (RBD)   | Donor                      | O – acceptor    | 11.1         | 11.6                                         | H-bond                             |
|                          | Ala522 (RBD)   | Donor                      | O – acceptor    | 8.2          | 8.5                                          | H-bond                             |
|                          | Thr393 (RBD)   | Donor                      | Ring            | 6.4          | 6.7                                          | $\pi$ -cation                      |
| ACE-2-RBD-20×Arb (400K)  | Lys61 (ACE-2)  | Donor                      | N – acceptor    | 13.0         | 15.2                                         | H-bond                             |
|                          | Phe486 (RBD)   | Donor                      | O – acceptor    | 12.6         | 14.7                                         | H-bond                             |
|                          | Thr582 (ACE-2) | Donor                      | O – acceptor    | 9.6          | 11.3                                         | H-bond                             |



**Table S3**Molecular dynamics statistics for systems Spike-protein-3×Arb

| Amino acids | Descript of Arb | Occupancy, % | Probability of intramolecular interaction, % | Type of intramolecular interaction |
|-------------|-----------------|--------------|----------------------------------------------|------------------------------------|
| Phe1042     | hydrophobic     | 19.4         | 44.5                                         | hydrophobic                        |
| Arg1019     | O – donor       | 15.8         | 36.4                                         | H-bond                             |
| Asn1023     | N – acceptor    | 3.3          | 7.5                                          | H-bond                             |
| Lys1028     | O – donor       | 1.5          | 3.4                                          | H-bond                             |

**Molecular docking results**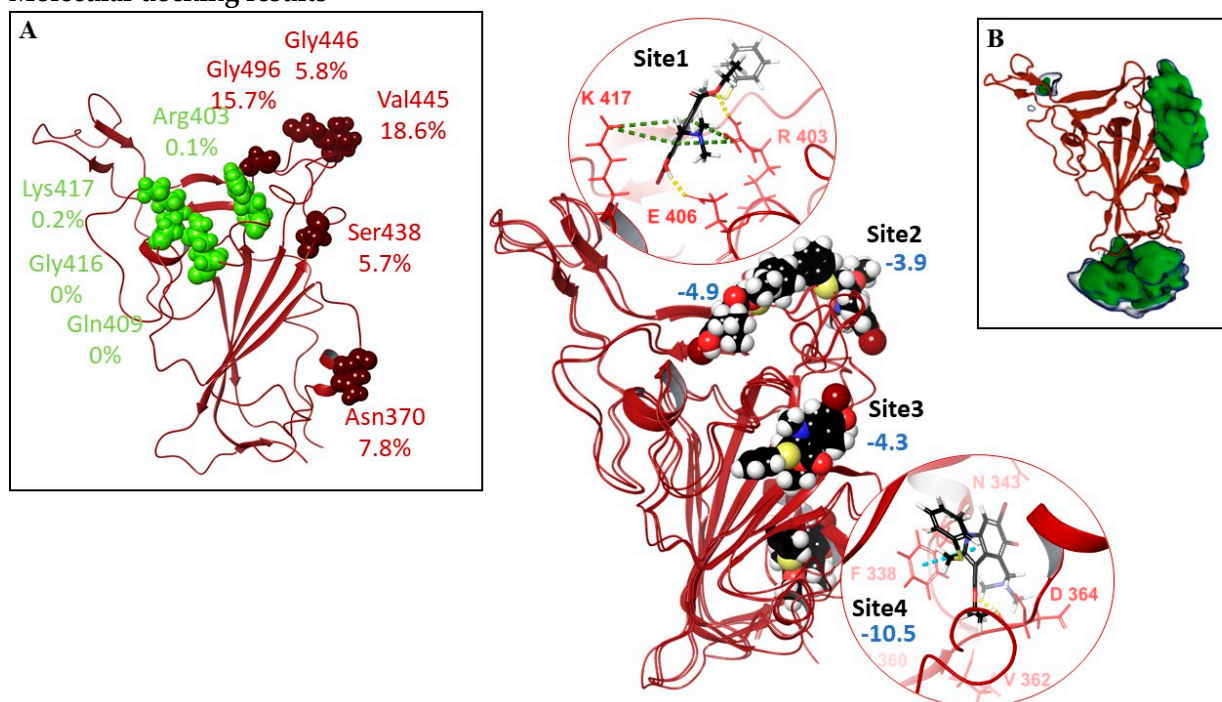

**Figure-S22** Molecular docking results to potential RBD binding sites: Numbers show glide score values (kcal/mol). Hydrogen and salt bridges are shown with yellow and purple dashed lines,  $\pi$ -cationic and  $\pi$ - $\pi$  stacking interactions with green and blue lines, respectively. A - Amino acid residues with which Arbidol molecules are most likely to interact are shown in dark red; light green amino acid residues are described in <sup>26</sup> as the likely binding site of Arbidol. B Weighted populations of Arbidol molecules on the protein surface because of statistical processing of molecular dynamic simulation data of the RBD-20×Arb system are shown.

**Table S4** Docking results into the sites of PBD

| Binding site      | Glide score | LE   | Glide Emodel | IFS score | Interaction      |                                                 |
|-------------------|-------------|------|--------------|-----------|------------------|-------------------------------------------------|
|                   |             |      |              |           | H-bond           | Others                                          |
| Site 1            | -4.94       | 0.17 | -56.76       | -379.01   | Arg403<br>Glu406 | Lys417<br>Arg403 $\pi$ -cation                  |
| Site 2            | -3.88       | 0.13 | -42.53       | -387.31   | Val445           | Asn439 – salt bridge                            |
| Site 3            | -4.33       | 0.15 | -47.60       | -387.99   |                  |                                                 |
| Site 4            | -10.48      | 0.36 | -88.75       | -397.31   | Asp364           | Phe338<br>$\pi$ - $\pi$                         |
| Site 4* (RBD-SUG) | -9.94       | 0.34 | -84.76       | -411.04   | NAG              | Phe373<br>$\pi$ -cation<br>Phe374 $\pi$ - $\pi$ |

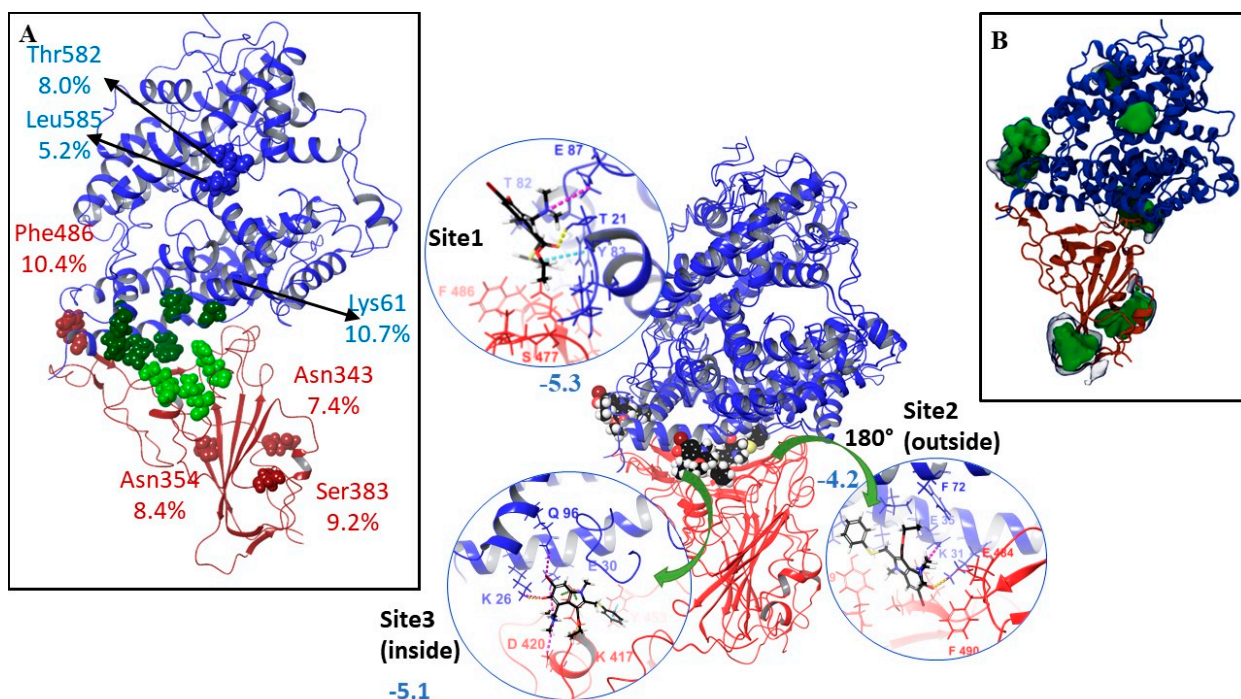

**Figure-S23** ACE-2-RBD-20 Arb. Molecular docking results to potential RBD binding sites. Numbers show glides score values. Hydrogen bonds and salt bridges are shown in yellow and purple dashed lines  $\pi$ -cationic and  $\pi$ - $\pi$ -stacking interactions in green and blue lines, respectively. A amino acid residues with which Arbidol molecules are most likely to interact are shown in dark red; green amino acid residues are described in 26 as the likely binding site of Arbidol (dark green amino acids refer to ACE-2; light green to RBD). B - Weighted average of Arbidol molecules on the protein surface resulting from statistical processing of data from molecular dynamic simulations of the ACE-2-RBD-20 $\times$ Arb system are shown.

**Table S5** Docking results into the interface of RBD-ACE-2 complex

| Binding site     | Glide score | LE   | Glide Emodel | IFD score | Interaction                 |                                                                                                     |
|------------------|-------------|------|--------------|-----------|-----------------------------|-----------------------------------------------------------------------------------------------------|
|                  |             |      |              |           | H-bond                      | Others                                                                                              |
| Site 1           | -5.28       | 0.18 | -50.25       | -1690.20  | ACE-2: Thr21                | ACE-2: Glu-87 salt<br>Tyr83 - $\pi$ -cation                                                         |
| Site 2 (outside) | -4.20       | 0.15 | -46.62       | -1684.09  | ACE-2: Lys31                | ACE-2: Lys31, Glu35                                                                                 |
| Site 3 (inside)  | -5.11       | 0.17 | -52.72       | -1689.87  | ACE-2: Lys26<br>RBD: Lys417 | ACE-2: Gln96 halogen bond<br>Lys26, Glu30 salt<br>RBD: Lys417 $\pi$ -cation<br>Tyr453 $\pi$ - $\pi$ |

**Table S6** Docking results into the subunits2

| Binding site     | Glide score | LE   | Glide Emodel | IFD score | Interaction |                                                                           |
|------------------|-------------|------|--------------|-----------|-------------|---------------------------------------------------------------------------|
|                  |             |      |              |           | H-bond      | Others                                                                    |
| Subunits 2 (FP2) | -7.70       | 0.27 | -67.63       | -3605.20  | Arg1019     | Glu-780 salt<br>Leu727,<br>Val1040,<br>Phe1042,<br>Leu1024<br>hydrophobic |
